# Supplementary material for: Sex Differences in Cluster Headache: Insights from the Chinese Cluster Headache Register Individual Study (CHRIS)
Source: Research Square preprint supplement (doi:10.21203/rs.3.rs-8245699/v1), 2025-12-10
Supplement: Supplementary file 1 [file 3007c7cba0940cf0d742ee9f.docx]

**Supplementary Appendix 2.** The usage rate and effectiveness of the treatments.

| **Category** | **Men(n=962)** | | | **Women (n=244)** | | | **P value** | |
| --- | --- | --- | --- | --- | --- | --- | --- | --- |
| **Usage rate(%)** | **Effectiveness (%)▲** | **Usage rate(%)** | | **Effectiveness (%)▲** | **Usage rate(%)** | | **Effectiveness (%)*** |
| ***Acute treatment*** |  |  |  | |  |  | |  |
| Patient | N=538（55.93） | — | N=144（59.02） | | — | — | | — |
| Triptans | 236（43.87） | 94（39.83） | 74（51.39） | | 27（36.49） | 0.107 | | 0.607 |
| Rizatriptan(Oral) | 85（15.80） | 27（31.76） | 40（27.78） | | 13（32.50） | ＜0.001* | | 0.934 |
| Zolmitriptan(Nasal spray) | 115（21.38） | 46（40.00） | 37（25.69） | | 13（35.14） | 0.269 | | 0.597 |
| Zolmitriptan(Oral) | 103（19.14） | 34（33.01） | 25（17.36） | | 5（20.00） | 0.626 | | 0.205 |
| Oxygen therapy | 125（23.23） | 49（39.20） | 34（23.61） | | 14（41.18） | 0.924 | | 0.835 |
| Pure oxygen | 105（19.52） | 44（41.90） | 29（20.14） | | 13（44.83） | 0.867 | | 0.778 |
| Non-pure oxygen | 49（9.11） | 14（28.57） | 7（4.86） | | 1（14.29） | 0.099 | | 0.732 |
| Nasal lidocaine | 23（4.28） | 2（8.70） | 5（3.47） | | 1（20.00） | 0.666 | | 0.459 |
| NSAIDs | 157（29.18） | — | 37（25.69） | | — | 0.410 | | — |
| Combination-analgesic | 105（19.52） | — | 31（21.53） | | — | 0.592 | | — |
| ***Transitional/Preventive treatments*** |  |  |  | |  |  | |  |
| Patient | N=150（15.59） | — | N=40（16.39） | | — | — | | — |
| Oral corticosteroids | 72（48.00） | 28（38.89） | 18（45.00） | | 9（50.00） | 0.736 | | 0.391 |
| Nerve block | 12（8.00） | 3（25.00） | 4（10.00） | | 2（50.00） | 0.933 | | 0.547 |
| Verapamil | 40（26.67） | 19（47.50） | 13（32.50） | | 4（30.77） | 0.465 | | 0.290 |
| Topiramate | 27（18.00） | 15（55.56） | 4（10.00） | | 0（0.00） | 0.224 | | 0.101 |
| Pregabalin | 34（22.67） | 4（11.76） | 7（17.50） | | 0（0.00） | 0.480 | | 1.000 |

▲Effectiveness (%)：The severity of the headache was reduced by more than 50% after attacks. The aforementioned relevant data are based on the patients' own accounts. Categorical variables are expressed as percentages (%). Nerve block: Corticosteroid injections over the great occpital nerve. NSAIDs：Non-steroidal Anti-inflammatory Drugs.
