# Supplementary material for: Sex Differences in Cluster Headache: Insights from the Chinese Cluster Headache Register Individual Study (CHRIS)
Source: Research Square preprint supplement (doi:10.21203/rs.3.rs-8245699/v1), 2025-12-10
Supplement: Supplementary file 2 [file ef101563a864b9c3437d8947.docx]

**Supplementary Appendix 1.** Headache profiles.

| **Features** | **Men(N =962)** | **Women(N =244)** | **P value** |
| --- | --- | --- | --- |
| ***Headache location, n(%)*** |  |  |  |
| Temporal region | 747（77.65） | 193（79.10） | 0.626 |
| Orbital/retro-orbital region | 720（74.84） | 196（80.33） | 0.073 |
| Forehead region | 375（38.98） | 96（39.34） | 0.917 |
| Parietal region | 300（31.19） | 78（31.97） | 0.814 |
| Occipital/neck region | 292（30.35） | 74（30.33） | 0.994 |
| Cheek region | 110（11.43） | 39（15.98） | 0.054 |
| Teeth | 89（9.25） | 47（19.26） | <0.001* |
| Ear | 37（3.85） | 28（11.48） | <0.001* |
| Other regions | 7（0.73） | 3（1.23） | 0.404 |
| ***Headache pattern, n(%)*** |  |  |  |
| Distended pain | 602（62.58） | 155（63.52） | 0.785 |
| Throbbing pain | 552（57.38） | 135（55.33） | 0.563 |
| Stab of pain | 321（33.37） | 106（43.44） | 0.003 |
| Dull pian | 180（18.71） | 62（25.41） | 0.020 |
| Electrical shock-like pain | 118（12.27） | 44（18.03） | 0.018 |
| Pressing/tightening pain | 112（11.64） | 45（18.44） | 0.005 |
| Burning pian | 105（10.91） | 25（10.25） | 0.763 |
| Aching pain | 43（4.47） | 13（5.33） | 0.569 |
| Other types of pain | 39（4.05） | 17（6.97） | <0.001* |

Data conforming to a normal distribution are expressed as mean ± standard deviation, while data not meeting the criteria for normal distribution were represented by the median and interquartile range (IQR). Categorical variables are expressed as percentages (%). CH: cluster headache.
